# Supplementary material for: Repayment Flexibility Can Reduce Financial Stress: A Randomized Control Trial with Microfinance Clients in India
Source: PLoS One. 2012 Sep 26;7(9):e45679. doi: 10.1371/journal.pone.0045679 (PMC3458929; doi:10.1371/journal.pone.0045679)
Supplement: Table S1 — Weekly vs. 5-weekly Randomization Check. (XLS) [file pone.0045679.s001.xls]

## Sheet: Sheet1
Table S1: Weekly vs. 5-week Randomization Check
	Client-level	Weekly	Treatment	Difference	N
	variable	mean		(2) – (1)	(control/treat)
Panel A: Controls		(1)	(2)	(3)	(4)
	Age	34.97	33.4	-1.543	98/100
				(1.141)
	Married	0.929	0.87	-0.0815**	98/100
				(0.0389)
	Household size	4.247	4.06	-0.184	97/100
				(0.257)
	Muslim	0	0.0125	0.0104	88/80
				(0.0103)
	Literate	0.866	0.93	0.0828	97/100
				(0.0541)
	Shock in last month (illness, death, flood)	0.465	0.475	0.00868	99/99
				(0.0861)
	Loan size (continuous)	8570	8500	48.79	100/100
				(330.85)
Joint test statistic: 0.285
Panel B: Other client characteristics
	No. of times surveyed	25	24.99	-0.00748	100/100
				(0.00727)
	Average length of DCS interview (mins)	12.23	12.7	0.61	2439/2437
				(1.391)
	Total asset value (Rs.)	13564	17512	3745	100/100
				(2564)
	Has household business	0.26	0.46	0.139	100/100
				(0.0977)
	Has savings	0.1	0.14	0.0274	100/100
				(0.0513)
	Years of education	6.739	6.857	0.0829	88/98
				(0.651)
	Weekly discount rate	342.6	349.4	-39.65	95/100
				(77.04)
	Educ expenses in last year (Rs.)	5692	5958	320.3	100/100
				(1134)
	Health expenses in last year (Rs.)	3797	4671	702.6	100/100
				(1146)
	Homeowner	0.793	0.873	0.0444	87/79
				(0.0635)
	Transfers into HH in last year (Rs.)	712.1	1124	337.3	99/98
				(293.1)
	Transfers out of HH in last year (Rs.)	1458	1417	-60.88	99/98
				(276.6)
	Financial control	0.755	0.77	-0.0146	94/100
				(0.0682)
	HH monthly income	8548	7303	-1324	100/100
				(1,109)
Joint test statistic: 0.484
	* significant at 10% level ** significant at 5% level *** significant at 1% level. The joint test statistic uses a Wald test to simultaneously measure the likelihood that all the coefficients are jointly equal to 0 (each coefficient is computed by regressing each of the control variables on the treatment variable, controlling for group level fixed effects.)
(1)	Weekly discount rate calculated from series of hypothetical questions about preferences between different sums of money at time of survey versus a week from time of survey. Financial control is a dummy for whether client answered "yes" to the following question: "If a close relative like your parents or siblings fell sick and needed money would you be able to lend money to that relative, if you h…
(2)	Differences reported in column (3) are the coefficient on the dummy for 5-week repayment schedule, in a regression of the client-level variable on stratification of group formation fixed effects and standard errors adjusted for within group correlation.
