# Supplementary material for: Repayment Flexibility Can Reduce Financial Stress: A Randomized Control Trial with Microfinance Clients in India
Source: PLoS One. 2012 Sep 26;7(9):e45679. doi: 10.1371/journal.pone.0045679 (PMC3458929; doi:10.1371/journal.pone.0045679)
Supplement: Table S2 — Coefficient of Variation. (XLS) [file pone.0045679.s002.xls]

## Sheet: Sheet1
Supplementary Table 2: Coefficient of variation
	Coefficient of variation in total income	Coefficient of variation in business income	Coefficient of variation in total household expenditures	Coefficient of variation in financial stress index
	(1)	(2)	(3)	(4)
Panel A
5-week	0.109	0.221	0.0686	0.14
	(0.131)	(0.209)	(0.0829)	(0.182)
Controls used	No	No	No	No
Panel B
5-week	0.0117	0.1861	-0.0374263	0.2058
	(0.1351)	(0.2413)	(0.0792)	(0.205)
Controls used	Yes	Yes	Yes	Yes
Observations	200	200	200	200
